# Supplementary material for: Cardiac tamponade as a rare complication of pediatric perforated appendicitis
Source: Springer Nature journal article supplement (doi:10.1007/s12630-019-01529-y), 2019-11-14
Supplement: MOESM1 [file 17388186]

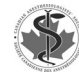

eTABLE Search strategy and search strings used in Medline ALL, Embase/Embase Classic, and Cochrane Central Register of Controlled Trials from inception until August 2019.

Ovid MEDLINE(R) ALL 1946 to August 12, 2019, Embase Classic+Embase 1947 to 2019 August 13, Cochrane Central Register of Controlled Trials 2014 to Present

| #         | Searches                                         | Results            |
|-----------|--------------------------------------------------|--------------------|
| 1         | Cardiac Tamponade/                               | 14670              |
| 2         | (cardia? adj2 tamponad*).mp.                     | 17882              |
| 3         | (pericardia* adj2 tamponad*).mp.                 | 4074               |
| 4         | or/1-3 [ Cardiac Tamponade ]                     | 23920              |
| 5         | Appendicitis/                                    | 40130              |
| 6         | Appendix/                                        | 13325              |
| 7         | appendicit*.mp.                                  | 57544              |
| 8         | appendix??.mp.                                   | 47379              |
| 9         | appendices.mp.                                   | 4175               |
| 10        | appendiceal.mp.                                  | 12766              |
| 11        | or/5-10 [ related to Appendix ]                  | 94509              |
| <b>12</b> | <b>4 and 11 [ Cardiac Tamponade + Appendix ]</b> | <b>18</b>          |
| 13        | remove duplicates from 12                        | 13                 |
| 14        | from 13 keep 1-3, 5, 8-9, 11-12                  | 8                  |
| 15        | pericardial effusion/                            | 33783              |
| 16        | (pericardi* adj2 tamponad*).mp.                  | 4875               |
| 17        | (heart? adj2 tamponad*).mp.                      | 16230              |
| 18        | 4 or 15 or 16 or 17                              | 54046              |
| 19        | 11 and 18                                        | 67                 |
| 20        | 19 not 12                                        | 49                 |
| <b>21</b> | <b>remove duplicates from 20</b>                 | <b>48</b>          |
| 22        | from 21 keep 1, 10, 14-15, 26, 28, 30...         | 13                 |
| 3         | 14 or 22                                         | <a href="#">21</a> |
| 24        | from 23 keep 15, 18                              | <a href="#">2</a>  |
